# Supplementary material for: Longitudinal evaluation of a countywide alternative to the Quality and Outcomes Framework in UK General Practice aimed at improving Person Centred Coordinated Care
Source: PubMed Central journal article supplement — BMJ Open. 2019 Jul 23;9(7):e029721. doi: 10.1136/bmjopen-2019-029721 (PMC6661675; doi:10.1136/bmjopen-2019-029721), 2019-07-23
Supplement: bmjopen-2019-029721supp002.pdf [file bmjopen-2019-029721supp002.pdf]

**Supplementary File 2: Timeline of SPQS scheme and evaluation.**

**Development Phase:**

April 2012 – March 2013

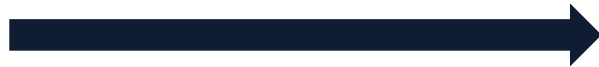

**Transition year from QOF to SPQS:**

April 2013 – March 2014

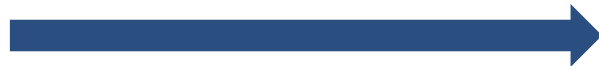

**Year 1 - Planning:**

April 2014 – March 2015

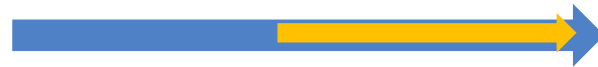

**Year 2 – Transformation:**

April 2015 – March 2016

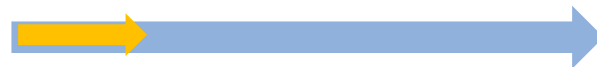

**Year 3 - Baseline year:**

April 2016 – March 2017

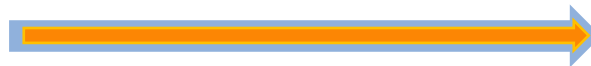

SPQS contract goes live in June 2014

Phase 1 Evaluation  
Nov 2014 – July 2015

Phase 2 Evaluation  
Nov 2015 – March 2017
