# Supplementary material for: Longitudinal evaluation of a countywide alternative to the Quality and Outcomes Framework in UK General Practice aimed at improving Person Centred Coordinated Care
Source: PubMed Central journal article supplement — BMJ Open. 2019 Jul 23;9(7):e029721. doi: 10.1136/bmjopen-2019-029721 (PMC6661675; doi:10.1136/bmjopen-2019-029721), 2019-07-23
Supplement: bmjopen-2019-029721supp004.pdf [file bmjopen-2019-029721supp004.pdf]

**Supplementary File 4:** Results of interrupted time-series analysis for emergency admissions on four long-term, ambulatory care sensitive conditions (ACSCs). Full results are provided, although the most relevant statistical tests (column “P>|t|”) are for the rows:

“\_z\_x659” the difference between the changes in intercept for SPQS and QOF pre/post intervention)

“\_z\_x\_t659” the difference between the changes in gradient for SPQS and QOF pre/post intervention.

All are non-significant, revealing no excess increases in emergency admissions in SPQS practices for these four ACSCs after the implementation of the SPQS scheme. Significant differences were observed, however, for changes in the *control* slope and/or intercept pre/post intervention for Acute Myocardial Infarction, Stroke and Diabetes . These are highlighted in red below.

### Acute Myocardial Infarction (AMI)

| Description                                                                        | PRIM_AMI       | Newey-West      |                 |             |              | [95% Conf. Interval] |                 |
|------------------------------------------------------------------------------------|----------------|-----------------|-----------------|-------------|--------------|----------------------|-----------------|
|                                                                                    |                | Coef.           | Std. Err.       | t           | P> t         |                      |                 |
| Pre-intervention control gradient                                                  | _t             | -.0007003       | .0025541        | -0.27       | 0.784        | -.0057435            | .0043429        |
| Difference between control/SPQS pre-intervention intercepts                        | _z             | .1396686        | .0801094        | 1.74        | 0.083        | -.0185102            | .2978475        |
| Difference between control/SPQS pre-intervention slopes                            | _z_t           | -.0024182       | .0034503        | -0.70       | 0.484        | -.009231             | .0043946        |
| Change in control intercept                                                        | _x653          | -.1043759       | .0677199        | -1.54       | 0.125        | -.2380911            | .0293393        |
| <b>Change in control slope</b>                                                     | <b>_x_t653</b> | <b>.0091594</b> | <b>.0030779</b> | <b>2.98</b> | <b>0.003</b> | <b>.0030819</b>      | <b>.0152369</b> |
| difference between the changes in intercept for SPQS and QOF pre/post intervention | _z_x653        | .0853708        | .0946241        | 0.90        | 0.368        | -.1014677            | .2722093        |
| difference between the changes in gradient for SPQS and QOF pre/post intervention  | _z_x_t653      | -.0003106       | .0040914        | -0.08       | 0.940        | -.0083892            | .0077679        |
| Intercept of control pre-intervention                                              | _cons          | .8103239        | .0652408        | 12.42       | 0.000        | .6815037             | .9391441        |

## Chronic Obstructive Pulmonary Disease (COPD)

| Description                                                                        | PRIM COPD | Newey-West |           |       |       |                      |          |
|------------------------------------------------------------------------------------|-----------|------------|-----------|-------|-------|----------------------|----------|
|                                                                                    |           | Coef.      | Std. Err. | t     | P> t  | [95% Conf. Interval] |          |
| Pre-intervention control gradient                                                  | _t        | .0105427   | .0048903  | 2.16  | 0.033 | .0008867             | .0201988 |
| Difference between control/SPQS pre-intervention intercepts                        | _z        | .0619958   | .1748488  | 0.35  | 0.723 | -.2832492            | .4072408 |
| Difference between control/SPQS pre-intervention slopes                            | _z_t      | -.0035803  | .0077243  | -0.46 | 0.644 | -.0188323            | .0116717 |
| Change in control intercept                                                        | _x653     | -.2382072  | .1889151  | -1.26 | 0.209 | -.6112265            | .1348121 |
| Change in control slope                                                            | _x_t653   | .0041691   | .0078257  | 0.53  | 0.595 | -.011283             | .0196211 |
| difference between the changes in intercept for SPQS and QOF pre/post intervention | _z_x653   | .1413474   | .2797523  | 0.51  | 0.614 | -.4110331            | .693728  |
| difference between the changes in gradient for SPQS and QOF pre/post intervention  | _z_x_t653 | -.0046434  | .011329   | -0.41 | 0.682 | -.0270129            | .0177261 |
| Intercept of control pre-intervention                                              | _cons     | 1.122065   | .1089517  | 10.30 | 0.000 | .9069359             | 1.337194 |

## Stroke

| Description                                                                        | PRIM STRK      | Newey-West       |                |              |              |                      |                 |
|------------------------------------------------------------------------------------|----------------|------------------|----------------|--------------|--------------|----------------------|-----------------|
|                                                                                    |                | Coef.            | Std. Err.      | t            | P> t         | [95% Conf. Interval] |                 |
| Pre-intervention control gradient                                                  | _t             | .0100503         | .0041188       | 2.44         | 0.016        | .0019176             | .0181831        |
| Difference between control/SPQS pre-intervention intercepts                        | _z             | .0528715         | .0954745       | 0.55         | 0.580        | -.1356461            | .2413891        |
| Difference between control/SPQS pre-intervention slopes                            | _z_t           | -.0053472        | .0047727       | -1.12        | 0.264        | -.014771             | .0040765        |
| Change in control intercept                                                        | _x653          | -.0003719        | .1374057       | -0.00        | 0.998        | -.2716843            | .2709404        |
| <b>Change in control slope</b>                                                     | <b>_x_t653</b> | <b>-.0158336</b> | <b>.005394</b> | <b>-2.94</b> | <b>0.004</b> | <b>-.0264841</b>     | <b>-.005183</b> |
| difference between the changes in intercept for SPQS and QOF pre/post intervention | _z_x653        | -.0449425        | .1616696       | -0.28        | 0.781        | -.3641647            | .2742798        |
| difference between the changes in gradient for SPQS and QOF pre/post intervention  | _z_x_t653      | .0119868         | .0062141       | 1.93         | 0.055        | -.0002831            | .0242568        |
| Intercept of control pre-intervention                                              | _cons          | 1.05749          | .0852406       | 12.41        | 0.000        | .8891793             | 1.2258          |

## Diabetes

| Description                                                                               | PRIM DIAB      | Newey-West       |                 |              |              |                  | [95% Conf. Interval] |  |
|-------------------------------------------------------------------------------------------|----------------|------------------|-----------------|--------------|--------------|------------------|----------------------|--|
|                                                                                           |                | Coef.            | Std. Err.       | t            | P> t         |                  |                      |  |
| Pre-intervention control gradient                                                         | _t             | .0025823         | .0026916        | 0.96         | 0.339        | -.0027323        | .0078969             |  |
| Difference between control/SPQS pre-intervention intercepts                               | _z             | .0005698         | .0759019        | 0.01         | 0.994        | -.1493012        | .1504408             |  |
| Difference between control/SPQS pre-intervention slopes                                   | _z_t           | -.0001994        | .0029745        | -0.07        | 0.947        | -.0060726        | .0056738             |  |
| <b>Change in control intercept</b>                                                        | <b>_x653</b>   | <b>-.2114749</b> | <b>.0751425</b> | <b>-2.81</b> | <b>0.005</b> | <b>-.3598463</b> | <b>-.0631036</b>     |  |
| Change in control slope                                                                   | _x_t653        | .0063408         | .0033715        | 1.88         | 0.062        | -.0003164        | .012998              |  |
| <b>difference between the changes in intercept for SPQS and QOF pre/post intervention</b> | <b>_z_x653</b> | <b>.1864524</b>  | <b>.0866148</b> | <b>2.15</b>  | <b>0.033</b> | <b>.0154285</b>  | <b>.3574763</b>      |  |
| difference between the changes in gradient for SPQS and QOF pre/post intervention         | _z_x_t653      | -.0052892        | .0038335        | -1.38        | 0.170        | -.0128586        | .0022802             |  |
| Intercept of control pre-intervention                                                     | _cons          | .3890688         | .0704267        | 5.52         | 0.000        | .2500088         | .5281288             |  |

## Combined (AMI/COPD/Stroke/Diabetes)

| Description                                                                        | SECD_AMI     | Newey-West       |                 |              |              |                  | [95% Conf. Interval] |  |
|------------------------------------------------------------------------------------|--------------|------------------|-----------------|--------------|--------------|------------------|----------------------|--|
|                                                                                    |              | Coef.            | Std. Err.       | t            | P> t         |                  |                      |  |
| Pre-intervention control gradient                                                  | _t           | .0224751         | .0064245        | 3.50         | 0.001        | .0097898         | .0351604             |  |
| Difference between control/SPQS pre-intervention intercepts                        | _z           | .2551058         | .227217         | 1.12         | 0.263        | -.193542         | .7037535             |  |
| Difference between control/SPQS pre-intervention slopes                            | _z_t         | -.0115452        | .009923         | -1.16        | 0.246        | -.0311385        | .0080482             |  |
| <b>Change in control intercept</b>                                                 | <b>_x653</b> | <b>-.5544301</b> | <b>.2489365</b> | <b>-2.23</b> | <b>0.027</b> | <b>-1.045964</b> | <b>-.0628964</b>     |  |
| Change in control slope                                                            | _x_t653      | .0038357         | .0103935        | 0.37         | 0.713        | -.0166866        | .024358              |  |
| difference between the changes in intercept for SPQS and QOF pre/post intervention | _z_x653      | .3682284         | .3741294        | 0.98         | 0.326        | -.3705031        | 1.10696              |  |
| difference between the changes in gradient for SPQS and QOF pre/post intervention  | _z_x_t653    | .0017436         | .0148231        | 0.12         | 0.907        | -.0275252        | .0310124             |  |
| Intercept of control pre-intervention                                              | _cons        | 3.378947         | .1531439        | 22.06        | 0.000        | 3.07656          | 3.681335             |  |
